# Supplementary material for: Incidence of HIV-Associated Tuberculosis among Individuals Taking Combination Antiretroviral Therapy: A Systematic Review and Meta-Analysis
Source: PLoS One. 2014 Nov 13;9(11):e111209. doi: 10.1371/journal.pone.0111209 (PMC4230893; doi:10.1371/journal.pone.0111209)
Supplement: Table S5 — List of studies included. (XLS) [file pone.0111209.s005.xls]

## Sheet: Sheet1
study	author	year	location	worldbankclass	hivrate	tbrateper100k	tbburden	studydesign	population	samplesize	medianmeanage	male	currentipt	pastipt	prevtb	msm	idu	cart	artnave	mediancd4entry	mediancd4artinitiation	nnrtibased	pibased	secondline	cultureavailable	tbcasesdef	mediandurationoffollowupmnths	durationoffollowuponcart	personyearsoffollowup	personyearsoffollowuponcart	prevalenttbbaseline	var33	incidenttbcases	var35	incidenttbcasesptb	incidenttbcasesetb	incidenttbcasesptbetb	tbcasesmalediag	tbcasesmedianagedig	tbcasesmedianagebline	tbcasescurrentiptuse	tbcasespastiptuse	tbcasesprevtb	tbcasesmediancd4countdiag	tbcasesmediancd4countbline	overalltbincidence	tbincidenceoncart	typeofcd4countused	tbincrate100
41	Bonnett MM	2006	multiple	low			high	retrospective	pts receiving HAART in programmes in 5 countries 2001-2003	3151	34.3	43						100				90			No	smear, CXR			3800.9	3800.9			320	10	65.3									.		8.4	8.4	.
35b	Brinkhoff	2007	multiple	low			high	retrospective	pts started on ART and enrolled in Idea cohots in low income countries	4540	36	49						100	100	107	107	69			No	smear, CXR	12	12	3468	3468			258	5.7										.	75	7.4	7.4	.
32	Moh	2007	Cote d'Ivoire	low	3.9	167	high	prospective	pts enrolled in the TRIVICAN ANSR 1269 trial	792	34	33			7			100	100	252	252	90	10		Yes	smear+culture	8	8	693	693			23	2.9	64	24	12							235		3.3	3.3	.
23	Etard JF	2009	Senegal	low	0.9	282	high	prospective	pts enrolled in the Senegalese ARV access initiative 1998- 2002	404								100	95	128	128	58	42		Yes	smear+culture	73		1821	1821	52	12.9	42	12	81									.		2.3	2.3	.
45	Seyler C	2003	Cote d'Ivoire	low	5.3	192	high	prospective	patients enrolled in the ANSR RCTs 1996-98	101	36	39						100		135	135		73		Yes	smear+culture	17	17	159	159			7	8										.		4.4	4.4	.
18	van Rie A	2010	South Africa	middle	17.8	981	high	prospective	pts starting ART at the Themba Lethu clinic Apri04-March2008	7536	36	33.5			12.9			100		109	109				Yes	smear+culture	21.4		13416.7	13416.7	1556	20.6	446	5.9	80.5	19.5		37.9	36.4				18.6	.	90.9	4.2	4.2	current	10.94
17	Lawn SD	2010	South Africa	middle	17.8	981	high	prospective	pts starting ART at Gugulethu community ART	241	33	28						100		125					Yes	smear+culture					76	31.5	11	4.6	64	36								.		9.2	9.2	.
2	Hermans SM	2012	Uganda	low	6.5	209	high	retrospective	Pts starting ART at AIDC	7659	37	36						100		109	109	85		0	.	recorded	12		5728				495													8.6	8.6	.
37	Lawn SD	2006	South Africa	middle	18.2	940	high	prospective	pts receiving care at Gugulethu community health centrre 2002- 2005	944	32	37			52			80		96					No	smear, CXR	10.4		782	782	238	25	81	10.7	78	22								.		10.5	10.5	.
12	Hanharan CF	2010	South Africa	middle	17.8	981	high	retrospective	pts starting ART at PHRU clinic Soweto	3456	33	22	13.9		13			22.6		285	138				Yes	smear+culture			5000		324	9	226	6.5										169		4.5	4.1	.
44	Lawn SD	2005	South Africa	middle	18.2	925	high	prospective	pts enrolled in the CT AIDS cohort and taking part in trials 1996- 2005	346	33	55			14			100		242	242				Yes	smear+culture	40	40	1108.8	1108.8			27	7.8										.		2.44	2.44	baseline	5.71
14	Dembele M	2010	Ivory Coast	low	1.2	55	intermediate	retrospective	pts initiated ART at 4 sites 1998- 2005	2383	36.1	30			4.1			100		153	127.7	88			No	smear, CXR	27.48						70	2.9	43	27								.		0.9	0.9	.
20	Golub JE	2009	South Africa	middle	17.8	971	high	retrospective	pts receiving care at 2 sites (urban and rural) seen Jun03-12/07	2778	33	21	13		0			30		266	156				Yes	smear +culture			4287	1045			267	9.6										.		6.2	4.31
4	Worodria W	2011	Uganda	low	6.5	209	high	prospective	pts starting ART at IDC	219	35.7	30						100	100	130	130				Yes	smear +culture					6	2.74	8	3.7						38.3				.	131	4.3	4.3	.
15	Hermans SM	2010	Uganda	low	6.5	209	high	retrospective	pts initiated on ART at the IDI in Kampala Jan 2003-Jan 2009	5982	37.2	33.5						100		117	117	96.8	3.2	0	No	smear, CXR	20.1		10710	10710			336	5.6				44.9		85.5				.	85.5	3.14	4.14	.
33	Moore D	2007	Uganda	Low	5.4	201	high	prospective	pts enrolled in a clinical trial to investigate clinical monitoring vs immunological 2003-2005	1044	38	27			18			100	100	127	127				Yes	smear+culture	16.8	16.8			75	7.2	53	5.5	80	17								.		3.9	3.9	.
16	Houlihan CF	2010	South Africa	middle	17.8	981	high	prospective	pts initiating ART at Africa Centre KZN Jan2005- March 2006	801	36	31.1			34			100		119.5	119.5				No	smear, CXR	26.16		1175.17	1175.17	198	25.3	81	10										.		6.89	6.89	.
6	Nicholas S	2011	Multiple SSA	low			high	retrospective	HIV clinic pts who started cART at 8 sites in 6 SSA countries	19325	35	35.8			8.8			100	95.5	142	150				No	smear, CXR	10.6		18162	18162			933	5	70.7	29.3								.		5.4	5.4	baseline	6.75
1	Gupta A	2012	South Africa	middle	17.8	981	high	prospective	urban RLS patients starting ART	1544	34	29.9			47			100		98	98				Yes	smear +culture	59.4		6506		464	30	424	27.5	74.8	24		33.2						.	94	7.44	7.44	current	25.49
19	Komati S	2010	South Africa	middle	17.8	981	high	prospective	pts enrolled in the Phidisa II trials 2004-2007	1771	36	68	0	0	27			100	100	106	106				Yes	smear +culture	24.7		3777	3777			254	14										.		6.72	6.72	.
43	Seyler C	2005	Cote d'Ivoire	low	4.6	182	high	retrospective	pts followed up in the Cotrame ANSR 1203 study and started HAART	129	32	37			24			100		125	125	35	65		Yes	smear+culture	26	26	273.5	273.5			12	9.3	75									.		4.8	4.8	.
24	Lawn SD	2009	South Africa	middle	17.8	971	high	prospective	pts accessing care at Gugulethu	1480	34	30	0	0	46			100	100	97	97				Yes	smear+culture	25.2		2785	2785	448	30	203	13.7	74	26								.		7.82	7.82	current	16.76
36	Jerene D	2006	Ethiopia	Low	2.1	276	high	prospective	pts initiating HAART under routine clinical conditions in South Ethiopia	180	34	57						100	100			100			No	smear, CXR	12.5	12.5	162.2	162.2			6	3.3	67	33								.		3.7	3.7	.
47	Badri M	2002	South Africa	middle	17.6	780	high	retrospective	patients taking part in th HAART trials in CT	264	34.5	56	0	0				100		254					.	.	16.8	16.8	375.1	375.1			9	2.6										..		2.4	2.4	baseline	3.4
5	Kabali C	2011	Tanzania	low	5.6	177	high	prospective	pts enrolled in the Dar Dar TB vaccine trial	558	32	30						5.7		444					Yes	smear +culture			1945.4	65.1			60	10.7										.			3.07	.
13	Abgrall S	2010	France	high	0.4	9.3	Low	prospective	pts at 62 University IDUs 1997- 2008	72580	36	67.4			0	31.8	15.4	10.2	73.9	330					Yes	smear+culture			427957	313807	932	1.28	1693	2.33	52.8	40.1	7.1	63.3	39					183		0.4	0.24	.
26	Moreno S	2008	Spain	high	0.4	17	Low	retrospective	pts enrolled in the Co-RIS cohort at 10 sites in Spain	4268	34.6	73						78.7	74.9	315	297				Yes	smear+culture	45.6	34.8	16465	11248			221	5.2	44	54	2							.		1.34	0.2	current
10a	Kruk A	2011	Western Europe	high			Low	retrospective	HIV+ pts receiving HIV care at 102 centres in Western Europe 2001-10	9138	41	77.3				45.5		77.3		422					Yes	smear+culture			55741				65	0.7	53									.		0.12		current	0.47
11	Pettit AC	2011	US	high	0.6	4.1	Low	retrospective	Pts at HIV clinic in Nashville TX	4535	38	77	1.4				12	77		320	242				Yes	smear+culture			20581				34	0.75	53	35		91		37				.	179	0.165		.
50	Jones JL	2000	United States	high	0.6	6.7	Low	retrospective	pts enrolled in the ASD cohort 1996-1998	14457								60							Yes	smear+culture				16032			80	0.5										.		0.5	0.19	.
8	Taarnhoj GA	2011	Denmark	high	0.2	6	Low	retrospective	pts in the Danish HIV cohort	2668	36.9	75				41		75		290					Yes	smear+culture			14711				120	4.5	57.5	31.7	10.8	70	35.4					120		0.82	0.65	.
42	Girardi E	2005	multiple	high			Low	prospective	pts enrolled in 12 ART cohort collaborations in Europe and North America 1996- 2003	17142	36	76			0	39	16.9	100	100	280	280	26.3	63		Yes	smear+culture	33.6	33.6	36906	36906			173	1										.		0.47	0.47	baseline	0.84
35a	Brinkhoff	2007	multiple	high			Low	retrospective	pts started on ART and enrolled in ART-CC cohorts in developed countries	22217	36	75						100	100	234	234				Yes	smear+culture			20416	20416			205	0.9										.	80	1	1	.
7	Martin-Echevarria	2011	Spain	high	0.4	16	Low	retrospective	HIV+ pts taking cART at IDU	1824	33	76			13.9	17.3	59	100		209					Yes	smear+culture	15.79						45	2.5										.	129	1.9	1.9	.
9	Sterling TR	2011	US + Canada	high	0.3	4.4	Low	retrospective	HIV+ pts in the NA-ACCORD database with 16 multisitesi US and Canada 1995-2009	37845	39	77					19	100	59	207	207	33	56		Yes	smear+culture	56.4		199779	198922			145	0.4	65	17		86		37		39		135		0.02	0.02	current	0.11
25	Grant	2009	United Kingdom	high	0.2	12	Low	retrospective	pts enrolled in the UK-CHIC 1996-2006	7181	35	77.2				58.7	4.8	100		328					Yes	smear+culture		39.6		74457			226	3.15										.			0.3	current	0.83
34	Golub JE	2007	Brazil	middle	0.7	48	intermediate	retrospective	pts receiving care at 29 Thrio study clinics 2003- 2005	11026	35	61.8	9.9		16.8			73.7		365	213				No	smear, CXR	24		17140	12880			391	3.5						36.3				.	172	2.28	1.79	.
27	Golub JE	2008	Brazil	middle	0.7	46	intermediate	retrospective	pts receiving care at 29 Thrio study clinics 2003- 2005	1080		66			100			93		192					not reported	.	28.8		3370	3061			96	8.9				66	33.9				100	201	197	2.8	2.6	baseline	2.8
31	Miranda A	2007	Brazil	middle	0.7	48	intermediate	retrospective	pts receiving HIV care in clinics in Brazil	463	34	70				59		66							Yes	smear+culture	11						39	8.4	59	41								134	111		1.2	baseline	3.6
28	Lannoy LH	2008	Brazil	middle	0.7	46	intermediate	retrospective	HIV+ pts notified to the Brasilia Federal district health department	281	31	59			0	21	14	52.2	100	196					Yes	smear+culture	60		1048		29	11.2	13	5.2					35					64		1.24	0.6	baseline	0.6
46	Hung CC	2003	Taiwan	.		76	intermediate	prospective	TB pts receiving care at Taiwan University Hospital 1994- 2003	126	37	91			100	47.6	1.6	80.3		37					Yes	smear+culture	29.6						8	6										75		2.5		.
21	Rajasekeran S	2009	India	middle	0.3	185	high	retrospective	pts attendin HIV clinc in Chennai India, 2004-2008	5099		59.4			48.7			100							No	smear, CXR			9250.8	9250.8			262	5.1	77.9	16		67.6						.		2.83	2.83	.
22	Zhou J	2009	multiple Asia	low-middle-high			intermediate	retrospective	consecutive pts enrolled in the Treat Asia Cohort	3279		70			22	18.7	4	75				73			Yes	smear+culture			6815	6460			135	4.12	44.4	14	3							159		1.98	1.32	current	8.87
[truncated: 18 more columns]
